# Supplementary material for: Harmonization of Rapid Evaporative Ionization Mass Spectrometry Workflows across Four Sites and Testing Using Reference Material and Local Food-Grade Meats
Source: MDPI journal article supplement (doi:10.3390/metabo12111130), 2022-11-17
Supplement: s1 [file s1]

## **Supplementary Material**

### **Harmonization of Rapid Evaporative Ionization Mass Spectrometry Workflows across Four Sites and Testing Using Reference Material and Local Food-Grade Meats**

Martin Kaufmann<sup>1,2‡</sup>, Pierre-Maxence Vaysse,<sup>3,4,5‡</sup> Adele Savage,<sup>6</sup> Ala Amgheib,<sup>6</sup> András Marton,<sup>7</sup> Eftychios Manoli<sup>6</sup>, Gabor Fichtinger,<sup>8</sup> Steven D. Pringle,<sup>9</sup> John F. Rudan,<sup>1</sup> Ron M.A. Heeren,<sup>3</sup> Zoltán Takáts,<sup>6</sup> Júlia Balog,<sup>6,7\*</sup> Tiffany Porta Siegel<sup>3\*</sup>

<sup>1</sup> Department of Surgery, Queen's University, Kingston, ON K7L 2V7, Canada

<sup>2</sup> Department of Biomedical and Molecular Sciences, Queen's University, Kingston, ON K7L 3N6, Canada

<sup>3</sup> Maastricht MultiModal Molecular Imaging (M4I) Institute, Division of Imaging Mass Spectrometry, Maastricht University, 6229 ER Maastricht, The Netherlands

<sup>4</sup> Department of Surgery, Maastricht University Medical Center + (MUMC+), 6229 HX Maastricht, The Netherlands

<sup>5</sup> Department of Otorhinolaryngology, Head & Neck Surgery, MUMC+, 6229 HX Maastricht, The Netherlands

<sup>6</sup> Division of Computational and Systems Medicine, Department of Surgery and Cancer, Imperial College London, London SW7 2BX, UK

<sup>7</sup> Waters Research Center, 1031 Budapest, Hungary

<sup>8</sup> School of Computing, Queen's University, Kingston, ON K7L 2N8, Canada

<sup>9</sup> Waters Corporation, Wilmslow SK9 4AX, UK

2

#### **Contents:**

4

Figure S1: REIMS system set-up and suitability checklist

5

Figure S2: Relative abundance of selected  $m/z$  bins in pork liver reference material by center

6

Figure S3: Analyst-dependent differences in REIMS spectra

7

Figure S4: Relative abundance of selected  $m/z$  bins in food-grade meats by meat type

8

Figure S5: Relative abundance of selected  $m/z$  bins in food-grade meats by center

Table S1: LSVC analysis of pork liver reference material and food-grade meats

## Supplementary Figure S1: REIMS System set-up and suitability checklist.

### 1. General

- ☐ Make sure the instrument has been in operate mode for 30 minutes
- ☐ If there is no signal on the instrument when solvent is flowing, try the following in the given order, and check if there is signal after each step:
  - Reinitialise
  - Change to other polarity mode (+) and back
  - Put MassLynx into instrument standby (red), then switch to operate again
  - Restart electronics

### **Instrument Settings:**

- ☐ The correct .ipr file is loaded
- ☐ Negative ionization mode is selected
- ☐ Sensitivity mode is selected
- ☐ Collision gas is ON
- ☐ Collision Energy is OFF
- ☐ Correct scan time is set (1s)
- ☐ Backing pressure is >1.5
- ☐ Collision pressure is between  $1.5 \times 10^{-1}$  –  $2.5 \times 10^{-1}$
- ☐ TOF pressure is below  $1.1 \times 10^{-6}$ , but ideally below  $9 \times 10^{-7}$
- ☐ Check the following instrument parameters are set, when MS Profile Type is set to Auto P, the grey values don't matter anymore:

|                      |        |                    |
|----------------------|--------|--------------------|
| Sampling Cone        | 40     | REIMS tab          |
| Source Offset        | 80     | REIMS tab          |
| Collision RF Offset  | 150    | Setup/RF settings  |
| Collision RF Initial | 50     |                    |
| Collision RF Final   | 150    |                    |
| MS Profile Type      | Auto P | Setup/Quad profile |
| MSProfileMass1       | 100    |                    |
| MSProfileDwellTime1  | 20     |                    |
| MSProfileRampTime1   | 20     |                    |
| MSProfileMass2       | 300    |                    |
| MSProfileDwellTime2  | 20     |                    |

## **2. REIMS source parameters:**

- ☐ Heater is turned ON
- ☐ Small IPA capillary is in place
- ☐ The impactor holder assembly is open
- ☐ After starting leu-enk in IPA, leu-enk peak is visible around 554.2
- ☐ There is no peak splitting of 554.2
- ☐ Check the resolution is  $>15000$  (for this use ResCalc software)
- ☐ Correct mass range is set (usually 50-1200)
- ☐ Check if the file duration is set to 0 when starting a file

## **Routine REIMS checklist:**

- ☐ The instrument has been calibrated/calibration was checked that day
- ☐ The instrument has been calibrated since last electronics shutdown/reboot
- ☐ The detector was calibrated in the past month

## ***Ex-vivo* breast tissue checklist:**

- ☐ The overall TIC (during burns)  $> 5e^7$
- ☐ Leu-enk intensity level per scan  $1e^5 - 5e^6$  at the beginning
- ☐ Leu-enk intensity level per scan  $1e^5 - 5e^6$  at the end
- ☐ Tissue intensity level per scan (highest peak in the  $m/z$  600-1000 range)  $> 5e^4$
- ☐ Resolution  $> 15000$  at the beginning of analysis
- ☐ Resolution  $> 15000$  at the end of analysis

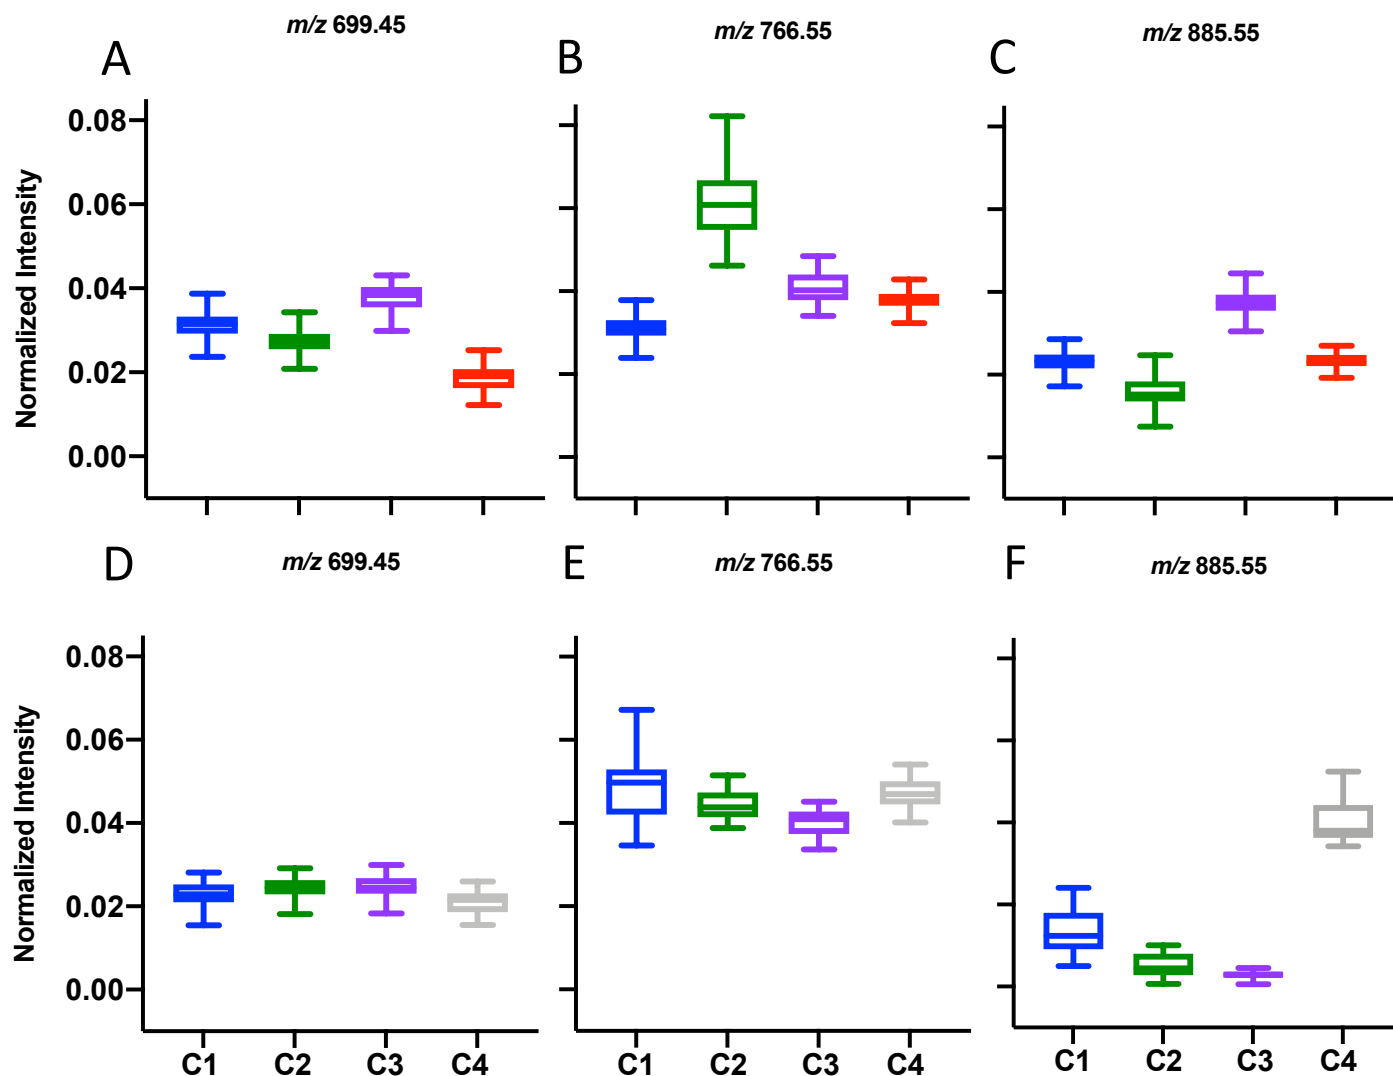

**Supplementary Figure S2: Relative abundance of selected  $m/z$  bins in pork liver reference material by center.** LSVC was used to identify  $m/z$  bins that correctly classified center >95% of the time (Table S1). Panels A-C present boxplots of 3/3 bins that achieved optimal cross-validation prior to method harmonization. Panels D-F show boxplots of the same  $m/z$  bins after method harmonization, which are a subset of the 13  $m/z$  bins required to achieve optimal cross-validation by site, after method harmonization. C4 used batch 1 pork liver for all analyses. C1-C3 used batch 1 pork liver prior to method harmonization, and batch 2 after method harmonization.  $P < 0.0001$  for all plots by non-parametric ANOVA.

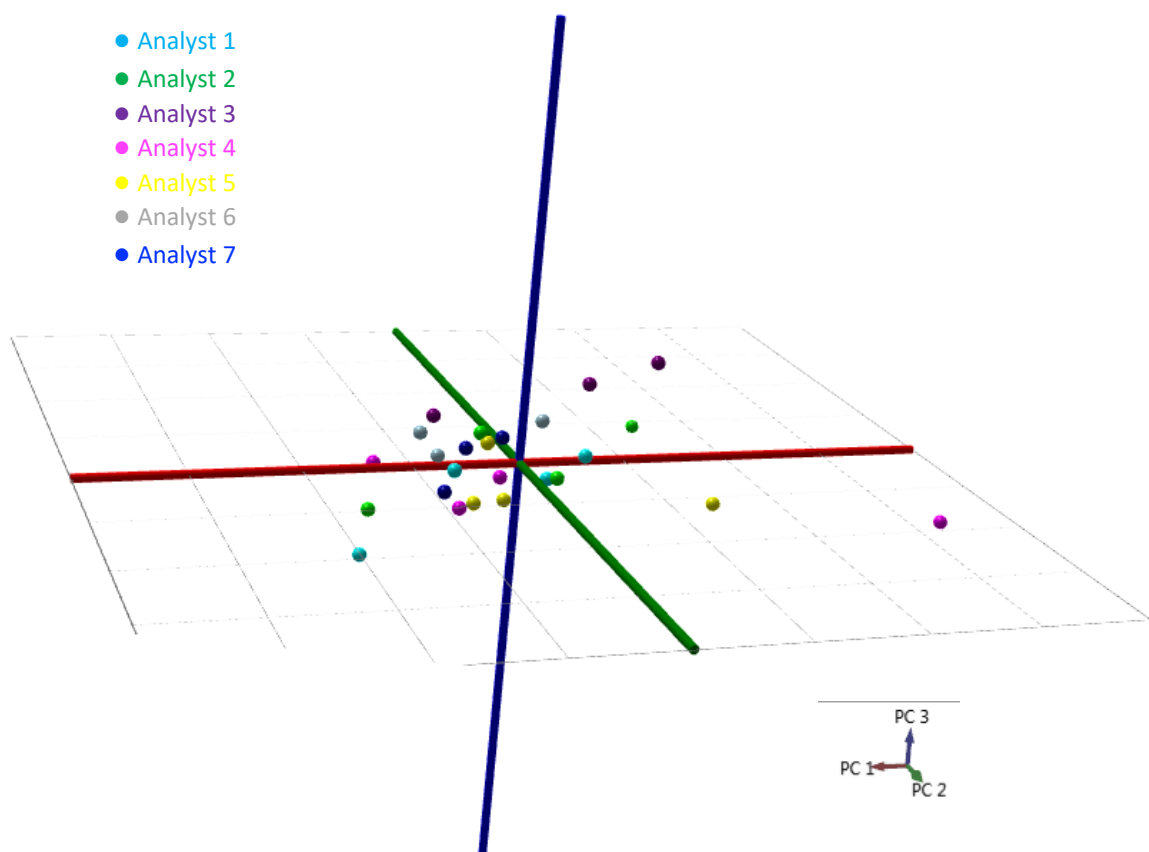

**Supplementary Figure S3: Analyst-dependent differences in REIMS spectra.** Seven analysts from all four centers conducted at least 3 REIMS analyses on batch 1 pork liver at C3. The PCA plot of the  $m/z$  600-1000 region of the mass spectra revealed insignificant analyst-dependent differences associated with sampling technique.

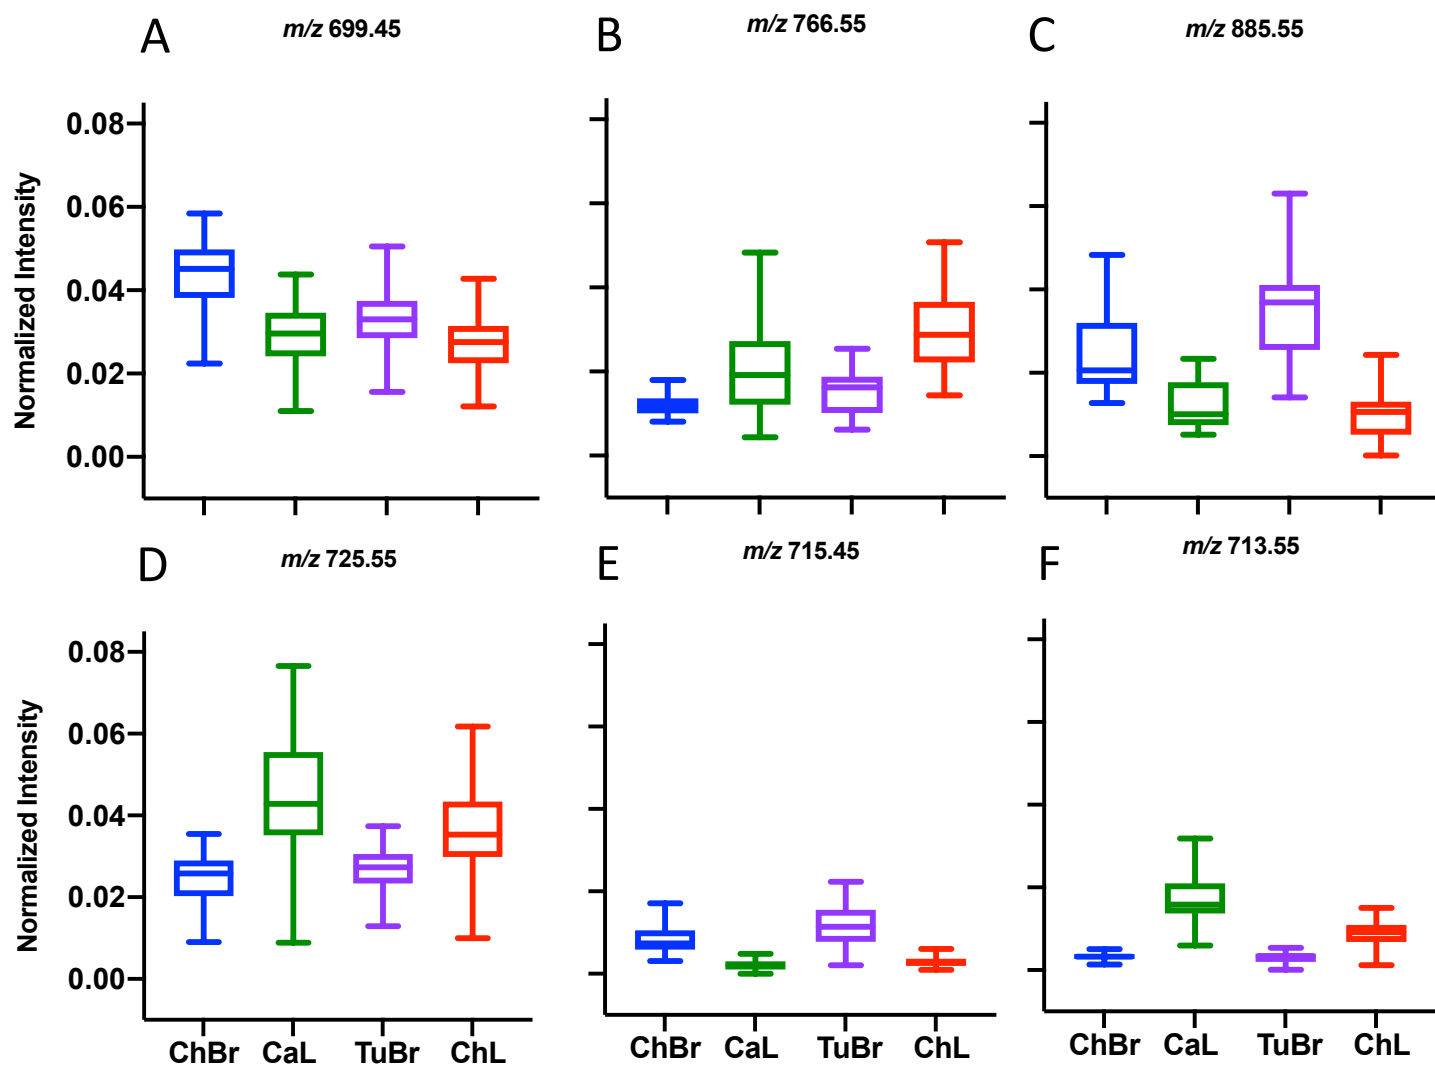

**Supplementary Figure S4: Relative abundance of selected  $m/z$  bins in food-grade meats by meat type.** LSVC was used to identify  $m/z$  bins that correctly classified center >95% of the time (Table S1). Panels A-F present boxplots of 6/14 bins that achieved optimal cross-validation.  $P < 0.0001$  for all plots by non-parametric ANOVA. ChBr: Chicken breast. CaL: Calf liver. TuBr: Turkey breast. ChL: Chicken liver..

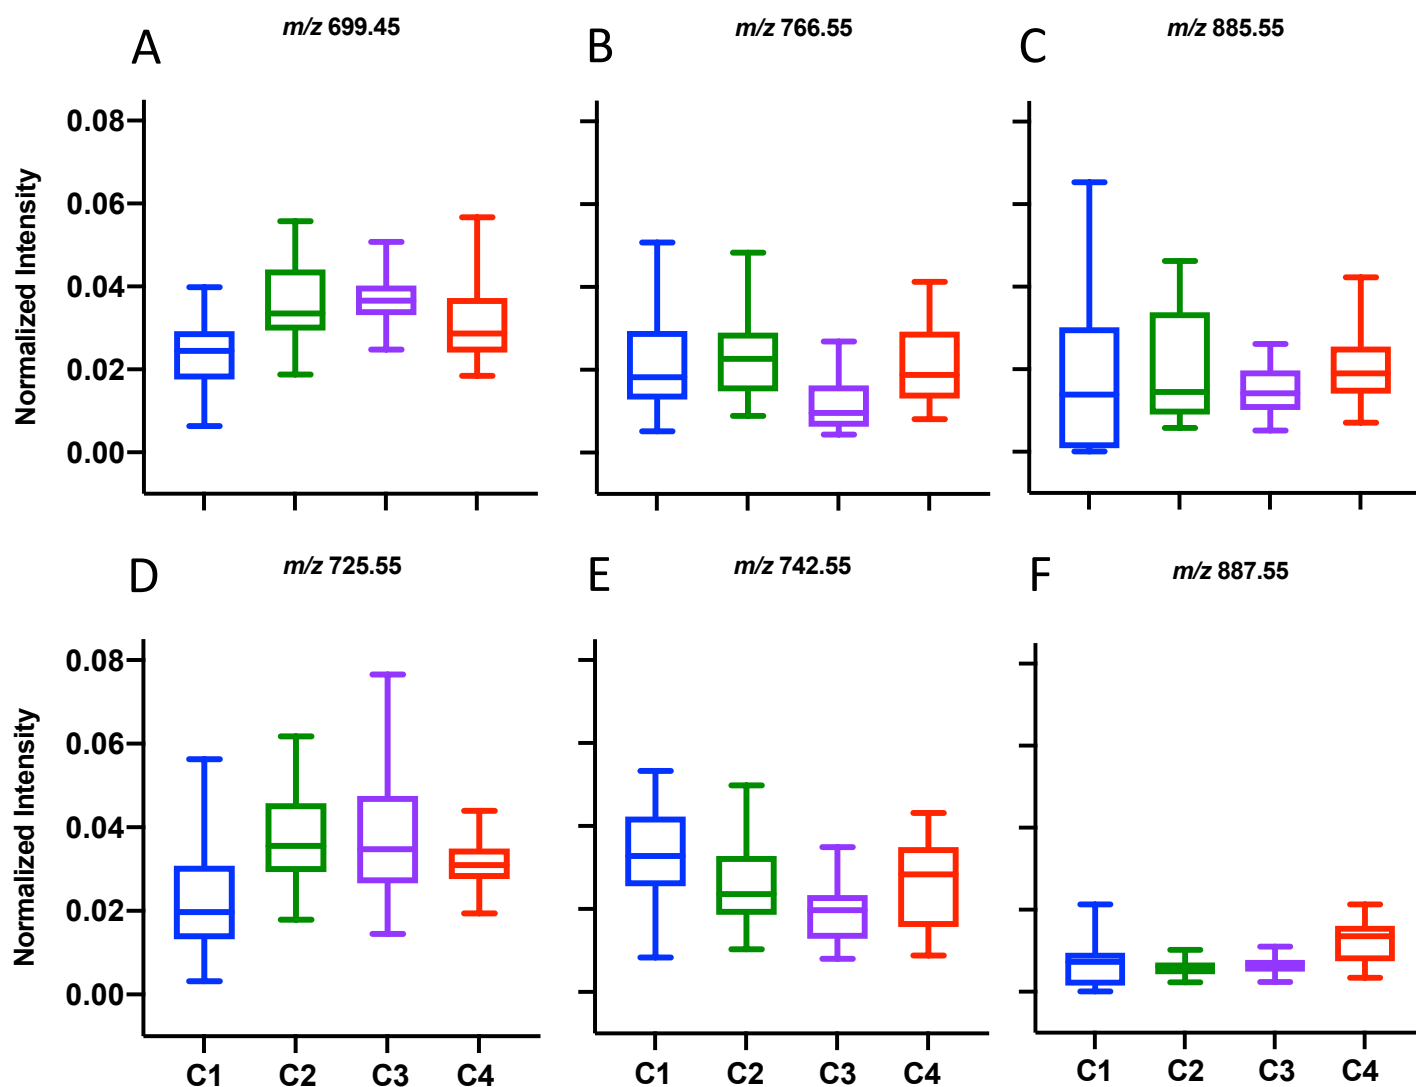

**Supplementary Figure S5: Relative abundance of selected  $m/z$  bins in food-grade meats by center.** LSVC was used to identify  $m/z$  bins that correctly classified all food-grade meats center >95% of the time (Table S1). Panels A-F present boxplots of 6/23 bins that achieved optimal cross-validation.  $P < 0.0001$  for all plots by non-parametric ANOVA.

**Supplementary Table S1: LSVC analysis of pork liver reference material and food-grade meats**

| Analysis/Parameter          | Pork Liver Ref. <sup>1</sup> | Pork Liver Ref. <sup>1</sup> | Food-grade meat <sup>2</sup> | Food-grade meat <sup>2</sup> |
|-----------------------------|------------------------------|------------------------------|------------------------------|------------------------------|
| Class for cross-validation  | Center                       | Center                       | Meat type                    | Center                       |
| Correct classification rate | 97%                          | 98%                          | 84.8%                        | 35%                          |
| No. of mass bins            | 3                            | 13                           | 19                           | 20                           |
| Selected <i>m/z</i> bin     |                              |                              |                              | 642.48                       |
|                             |                              |                              |                              | 671.47                       |
|                             |                              |                              |                              | 673.48                       |
|                             |                              | 682.59                       |                              |                              |
|                             |                              | 695.46                       |                              |                              |
|                             |                              | 697.48                       | 697.48                       | 697.48                       |
|                             | 699.5                        | 699.55                       | 699.5                        |                              |
|                             |                              |                              | 700.5                        | 700.5                        |
|                             |                              |                              | 705.48                       | 705.48                       |
|                             |                              |                              | 713.51                       |                              |
|                             |                              |                              | 715.5                        | 715.5                        |
|                             |                              |                              | 721.48                       |                              |
|                             |                              | 723.5                        | 723.5                        |                              |
|                             |                              | 725.51                       | 725.51                       | 725.51                       |
|                             |                              |                              | 727.53                       |                              |
|                             |                              |                              |                              | 737.51                       |
|                             |                              |                              |                              | 738.51                       |
|                             |                              | 742.54                       |                              | 742.54                       |
|                             |                              |                              | 743.53                       | 743.53                       |
|                             |                              |                              | 744.55                       | 744.55                       |
|                             |                              |                              |                              | 747.5                        |
|                             |                              |                              |                              |                              |
|                             |                              |                              | 751.52                       | 751.52                       |
|                             | 766.54                       | 766.54                       | 766.54                       | 766.54                       |
|                             |                              | 767.54                       |                              |                              |
|                             |                              |                              | 768.55                       |                              |
|                             |                              | 769.53                       |                              | 769.53                       |
|                             |                              |                              | 770.57                       |                              |
|                             |                              |                              | 773.53                       | 773.53                       |
|                             |                              | 787.48                       |                              |                              |
|                             |                              | 794.57                       |                              |                              |
|                             |                              |                              |                              | 861.55                       |
|                             |                              |                              | 863.56                       |                              |
|                             | 885.55                       | 885.55                       | 885.55                       |                              |
|                             |                              |                              |                              | 887.56                       |

<sup>1</sup>LSVC analysis optimized to achieve >95% correct classification rate for indicated samples and class, based on 4-fold cross-validation. Selected *m/z* bins are indicated.

<sup>2</sup>Standard LSVC and cross-validation by leaving one site out (meat type as class) or leaving one meat type out (center as class) results for food-grade meat by meat type or center. Selected *m/z* bins are indicated.
